# Supplementary material for: SARS-CoV-2 intervened by NSAIDs: A network pharmacology approach to decipher signaling pathway and interactive genes
Source: Research Square preprint supplement (doi:10.21203/rs.3.rs-111615/v1), 2020-11-30

# Title Page

## Research article

### **SARS-CoV-2 intervened by NSAIDs: A network pharmacology approach to decipher signaling pathway and interactive genes**

Ki Kwang Oh<sup>1</sup>, Md. Adnan<sup>1</sup>, Dong Ha Cho<sup>1\*</sup>

<sup>1</sup>Department of Bio-Health Convergence, College of Biomedical Science, Kangwon National University, Chuncheon, 24341, Korea

**\*Correspondence:** chodh@kangwon.ac.kr; Tel.: +82-33-250-6475

#### **Email of Authors:**

<sup>1</sup>Ki Kwang Oh (KKO): nivirna07@kangwon.ac.kr

<sup>1</sup>Md. Adnan (MA): mdadnan1991.pharma@gmail.com

<sup>1</sup>Dong Ha Cho (DHC): chodh@kangwon.ac.kr

**Running title:** Potential Non-Steroidal Anti-Inflammatory Drugs (NSAIDs) and novel mechanism against SARS-CoV-2

**Supplementary Figure S1.**

- (a) Interactions between three bioactive compounds and MAPK8.
- (b) Interactions between twelve bioactive compounds and MAPK10.
- (c) Interactions between two bioactive compounds and BAD.

**(a)**

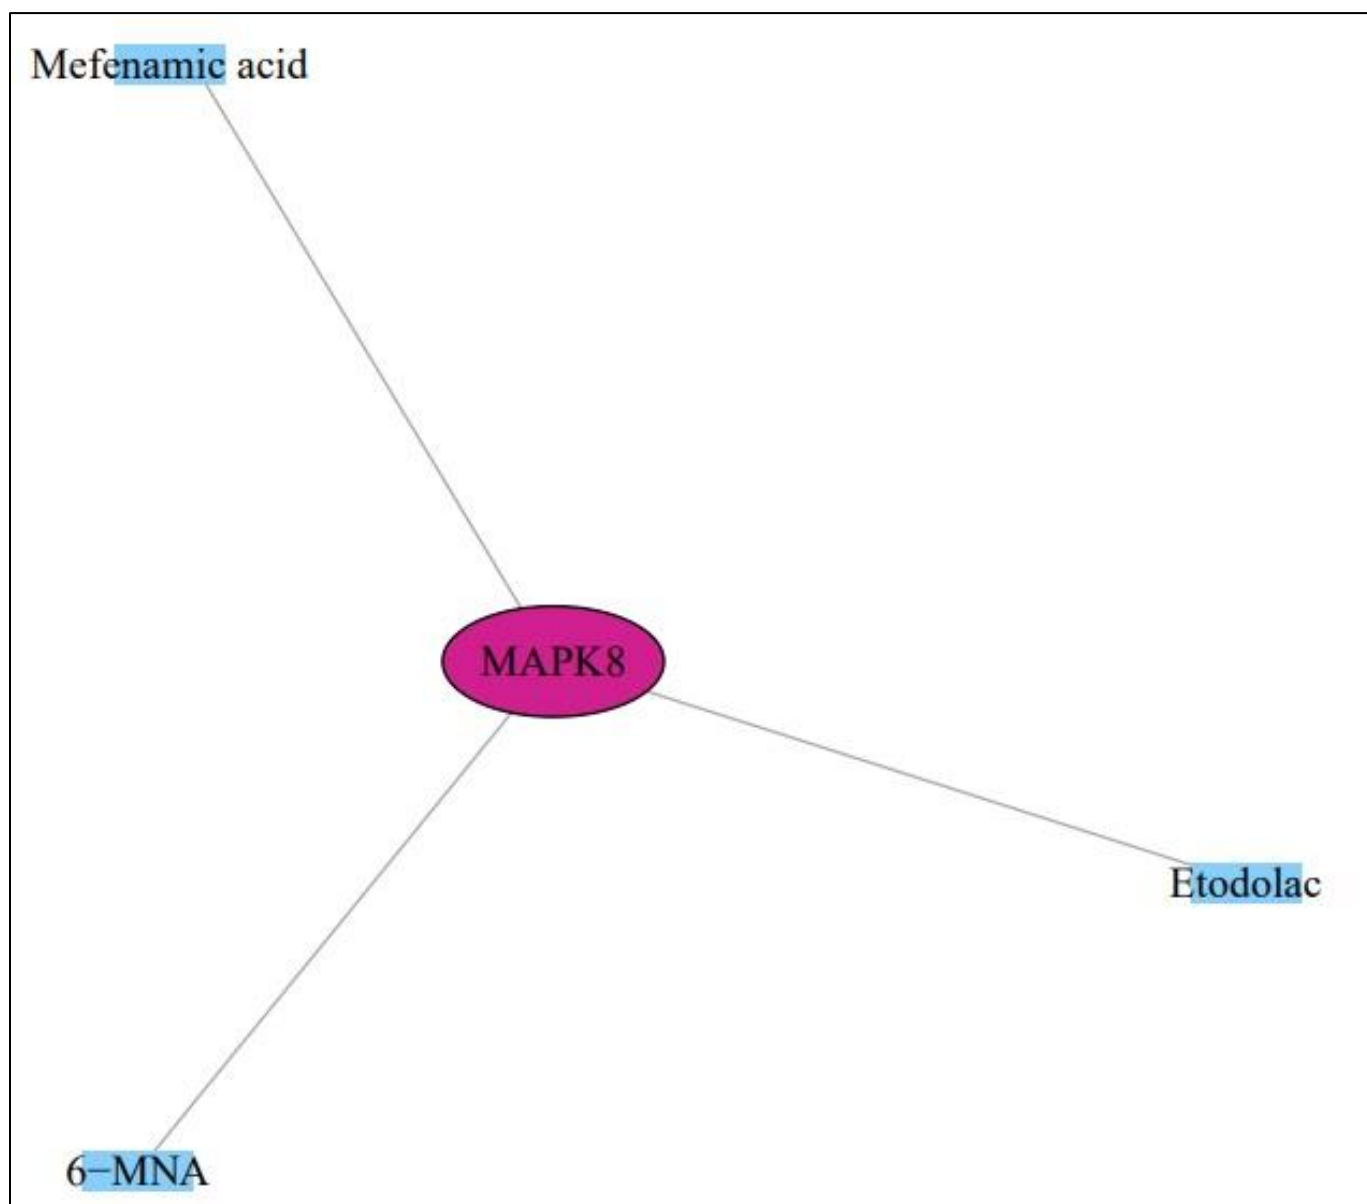

(b)

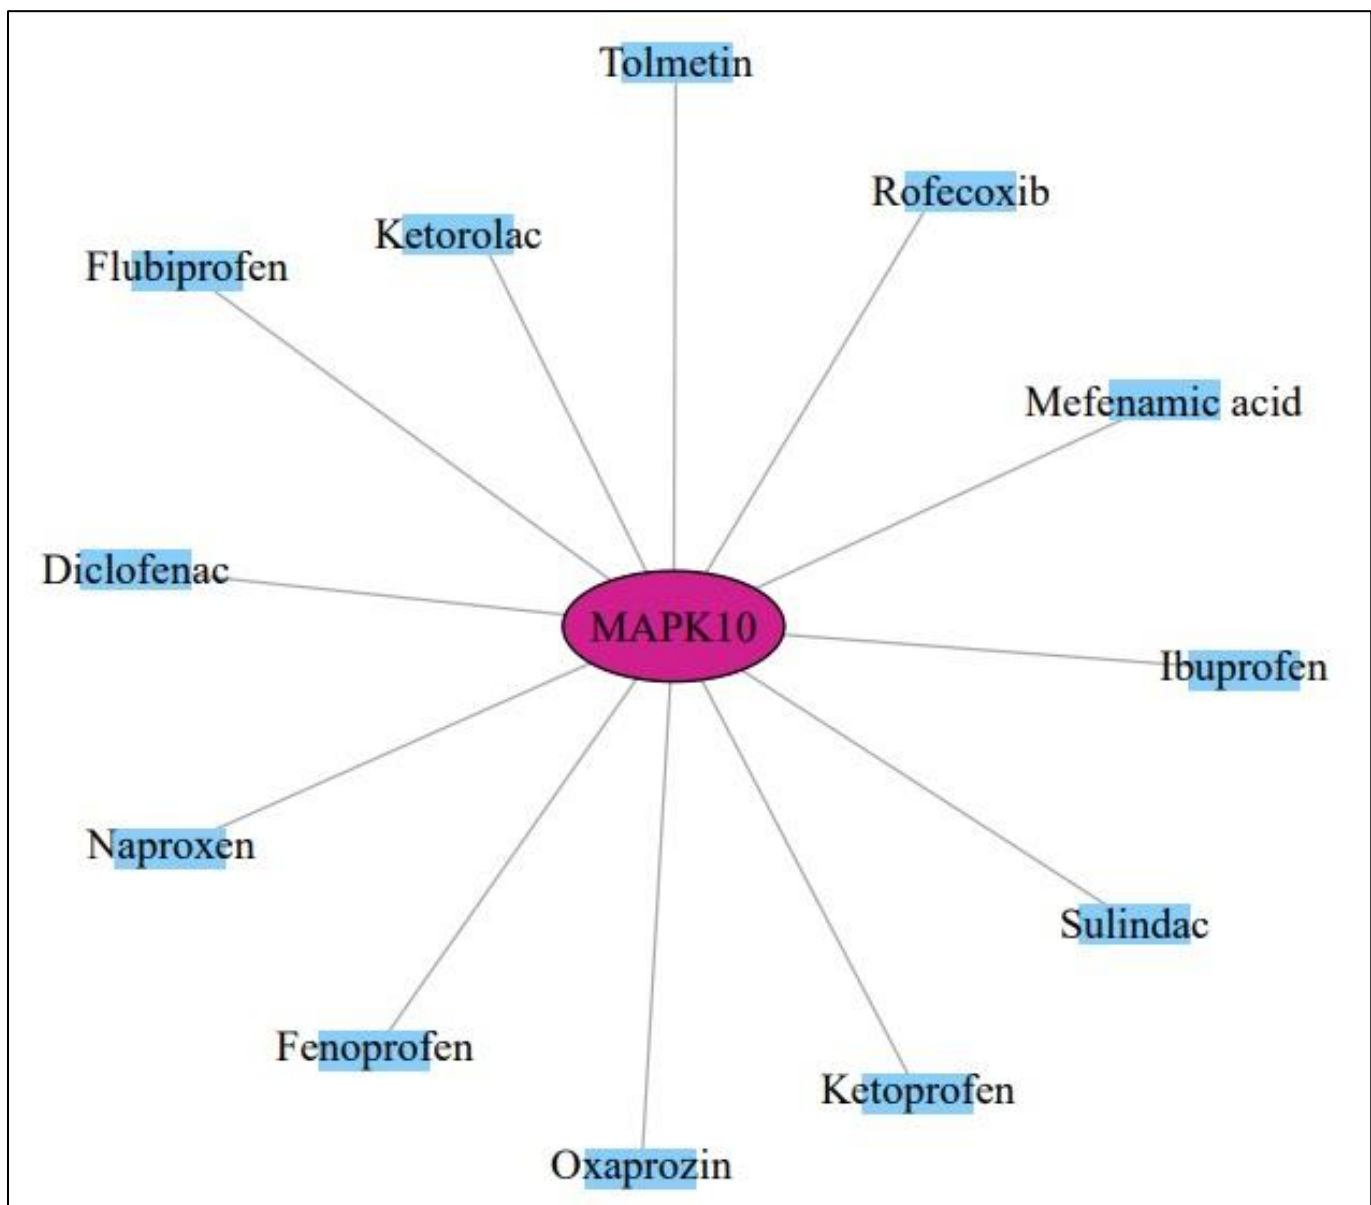

(c)

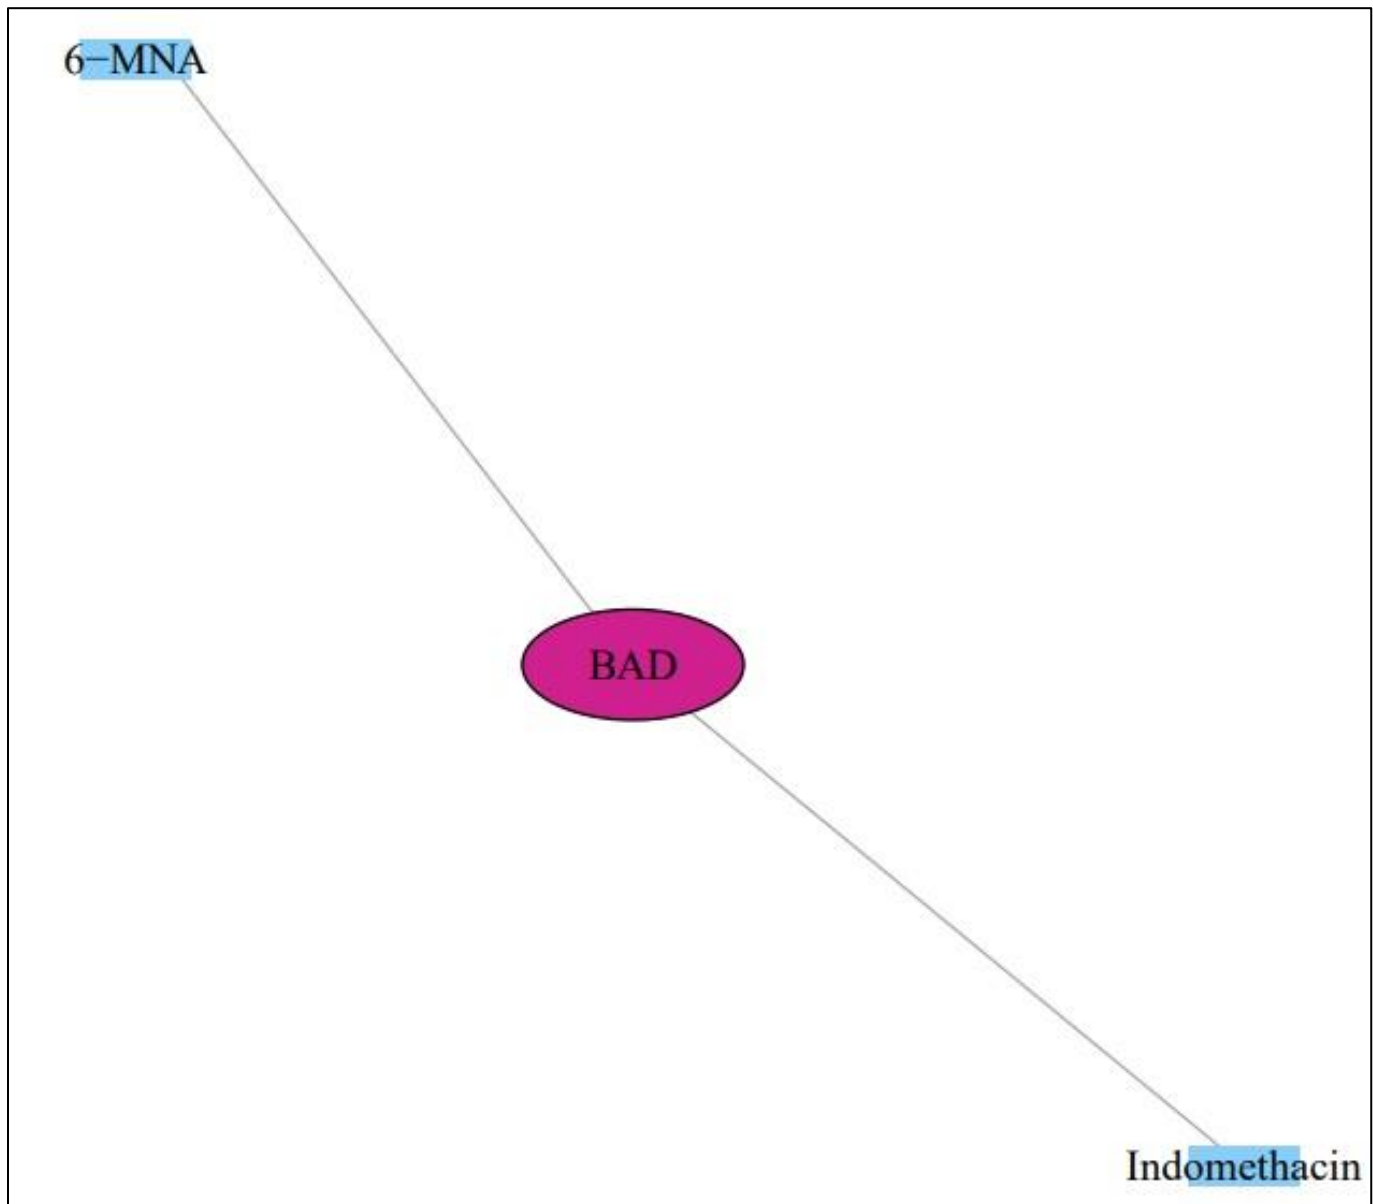

Supplement: Supplementary file 1 [file 31571c1ed629f58448c44d1e.pdf]
