# Supplementary material for: SARS-CoV-2 intervened by NSAIDs: A network pharmacology approach to decipher signaling pathway and interactive genes
Source: Research Square preprint supplement (doi:10.21203/rs.3.rs-111615/v1), 2020-11-30

**Supplementary Figure S1.**

- (a) Interactions between three bioactive compounds and MAPK8.
- (b) Interactions between twelve bioactive compounds and MAPK10.
- (c) Interactions between two bioactive compounds and BAD.

**(a)**

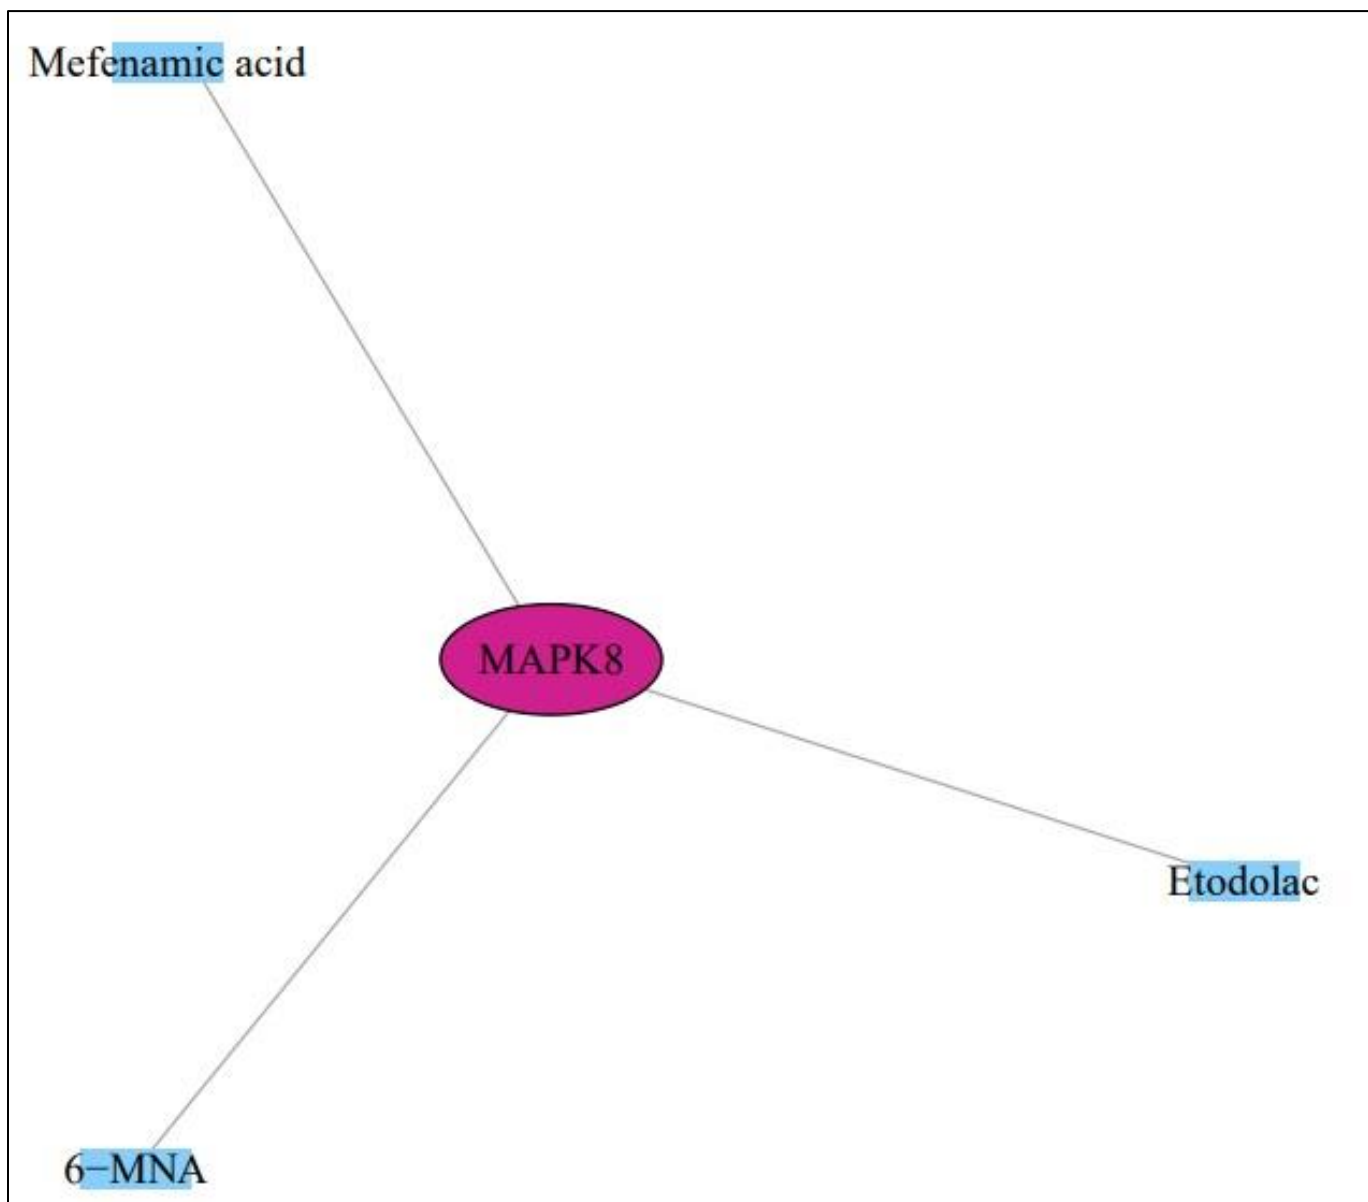

(b)

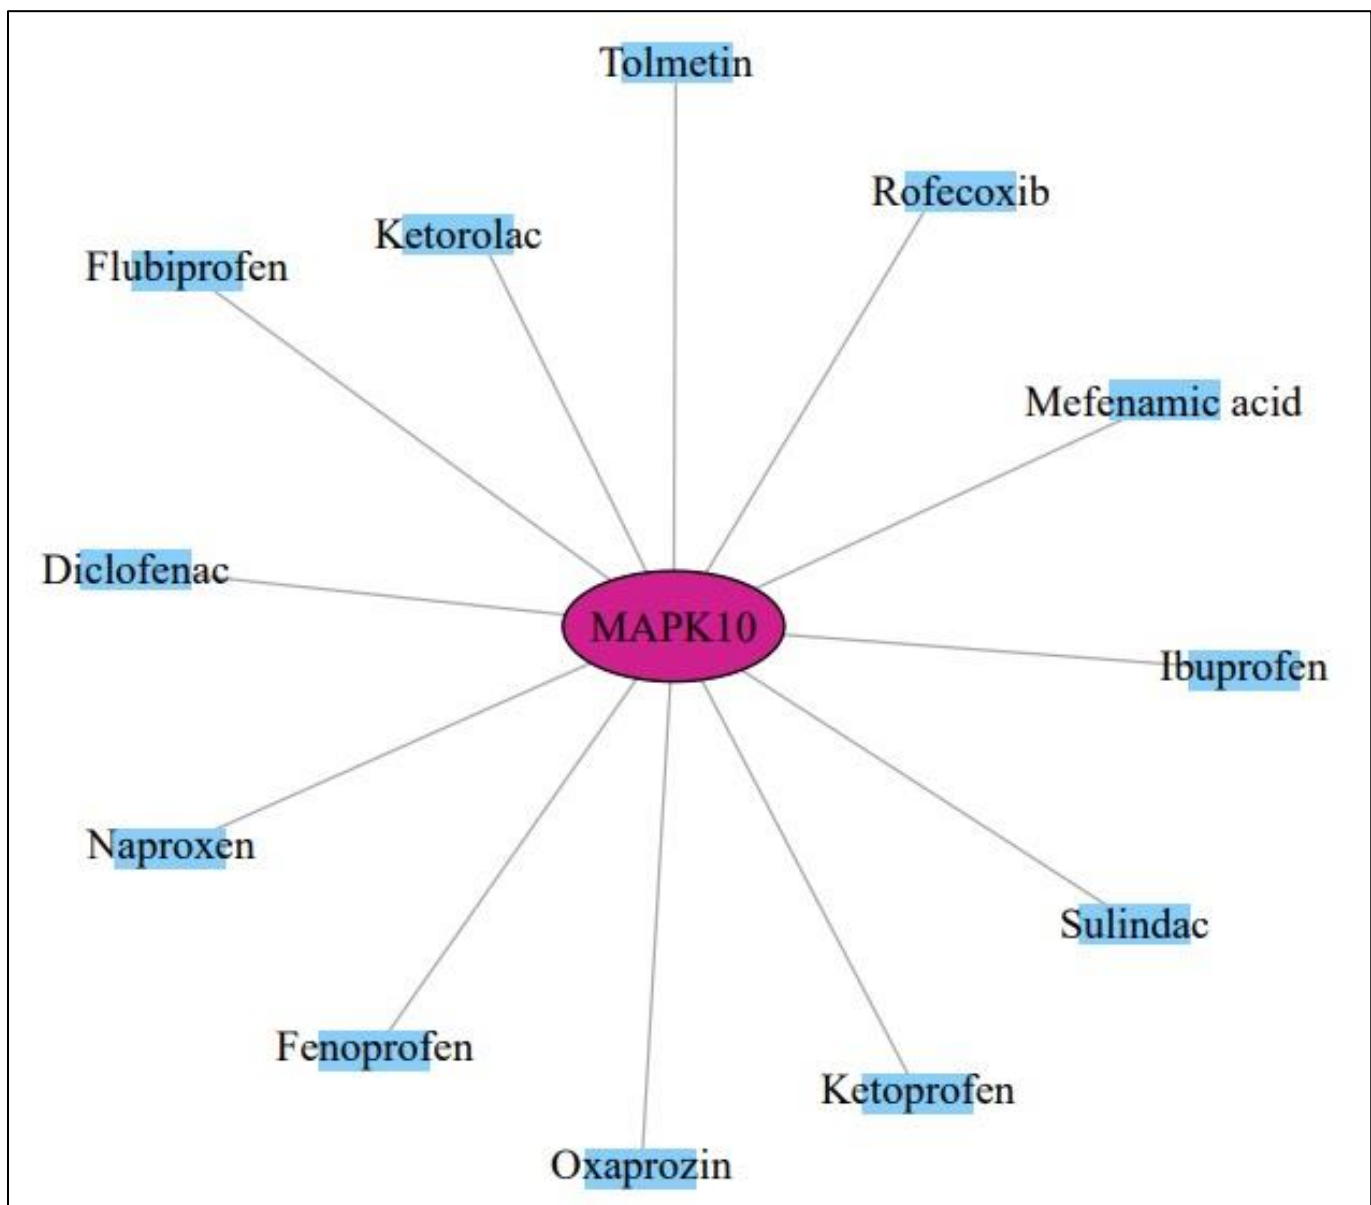

(c)

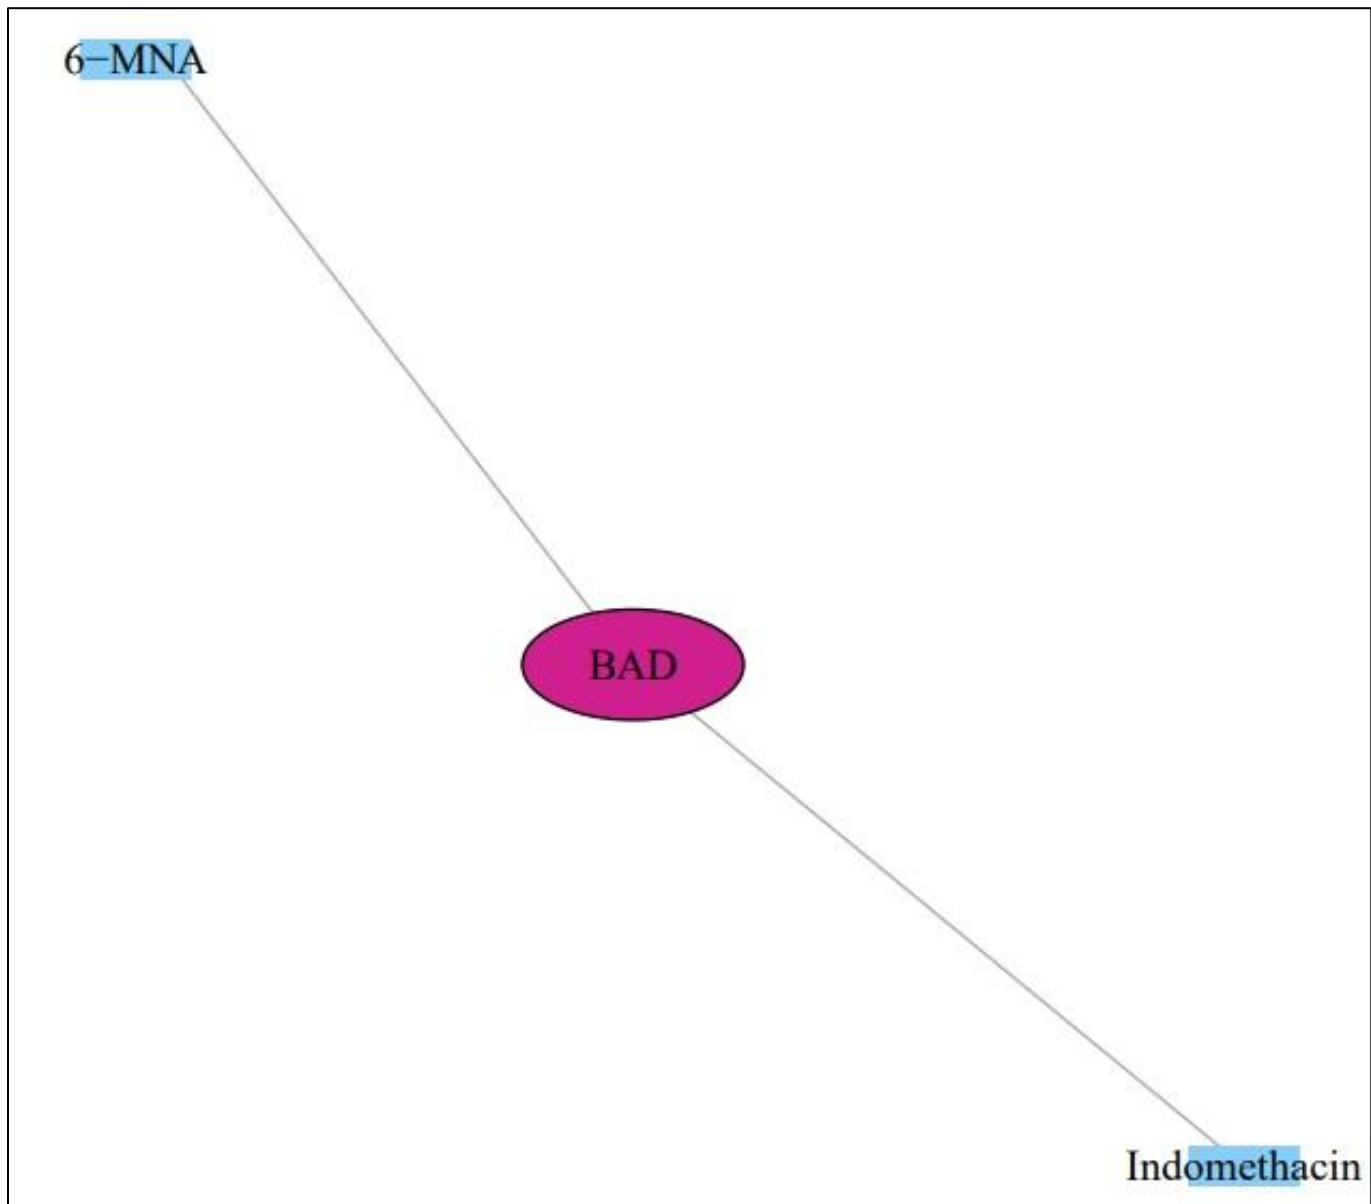

Supplement: Supplementary file 2 [file dbeb31726b0319f8d3223230.pdf]
